# Supplementary material for: PTEN counteracts FBXL2 to promote IP3R3– and Ca2+–mediated apoptosis limiting tumour growth
Source: PubMed Central journal article supplement (PMC5627969; doi:10.1038/nature22965), 2017-06-14

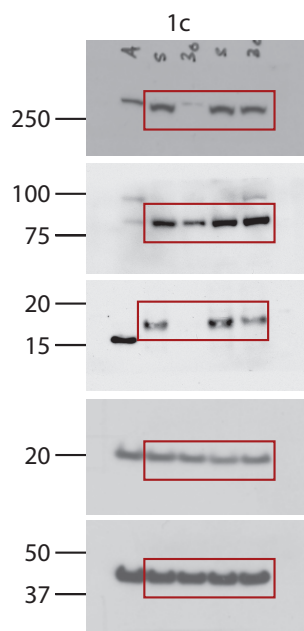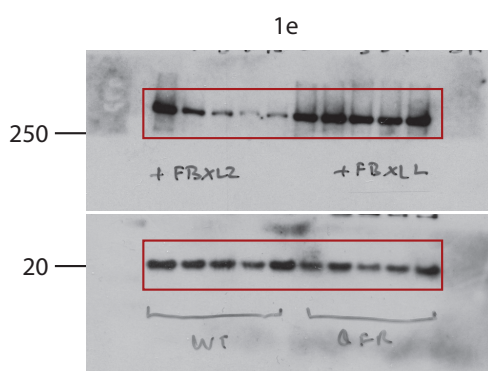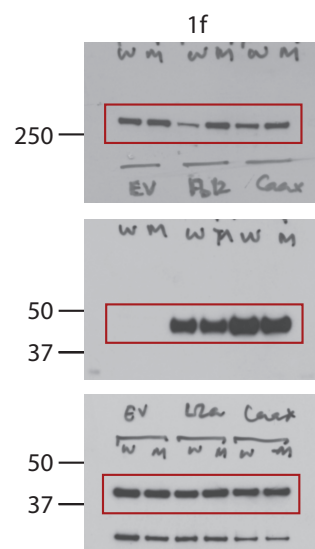

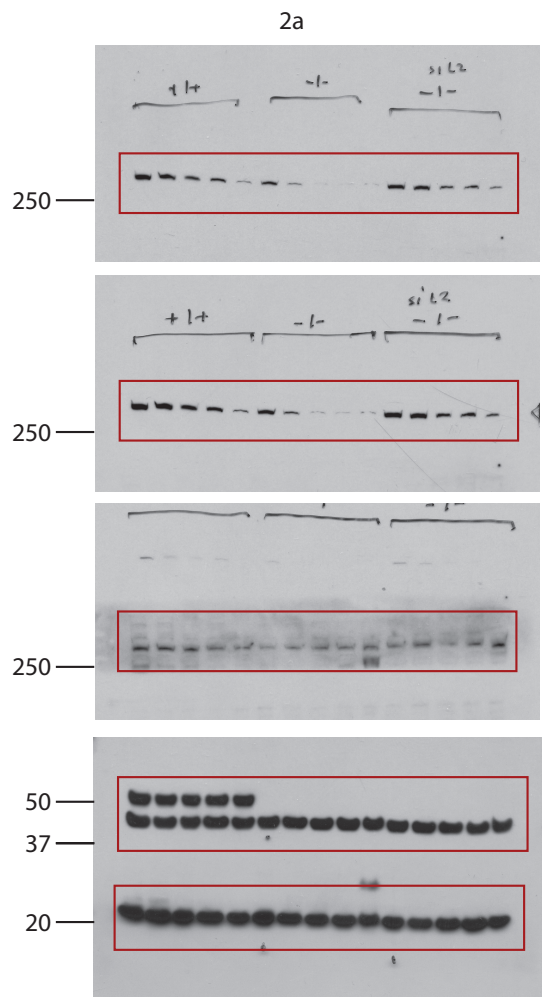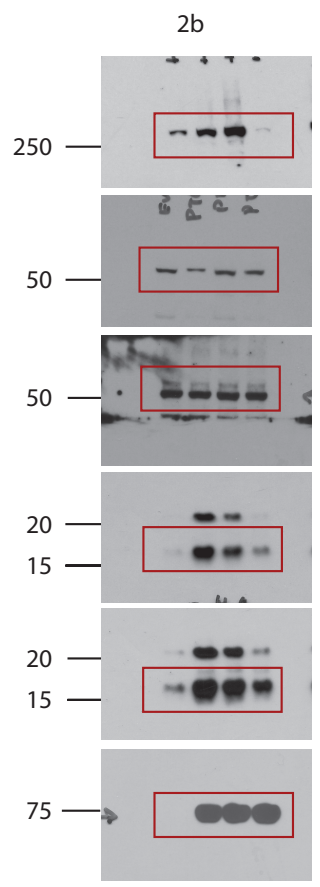

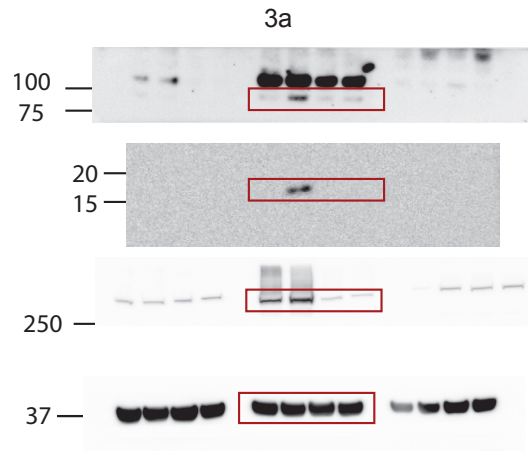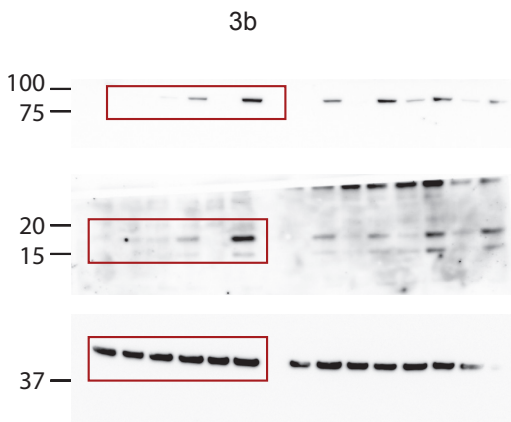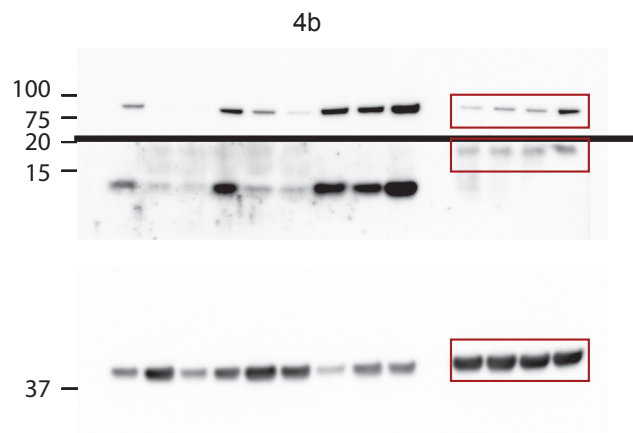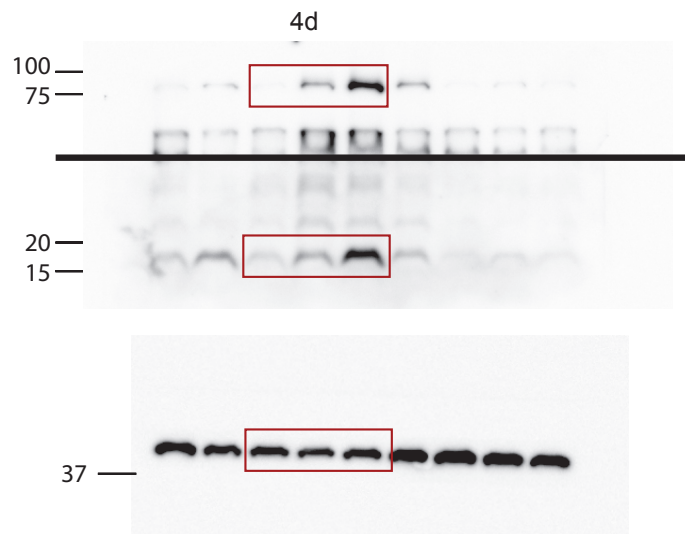

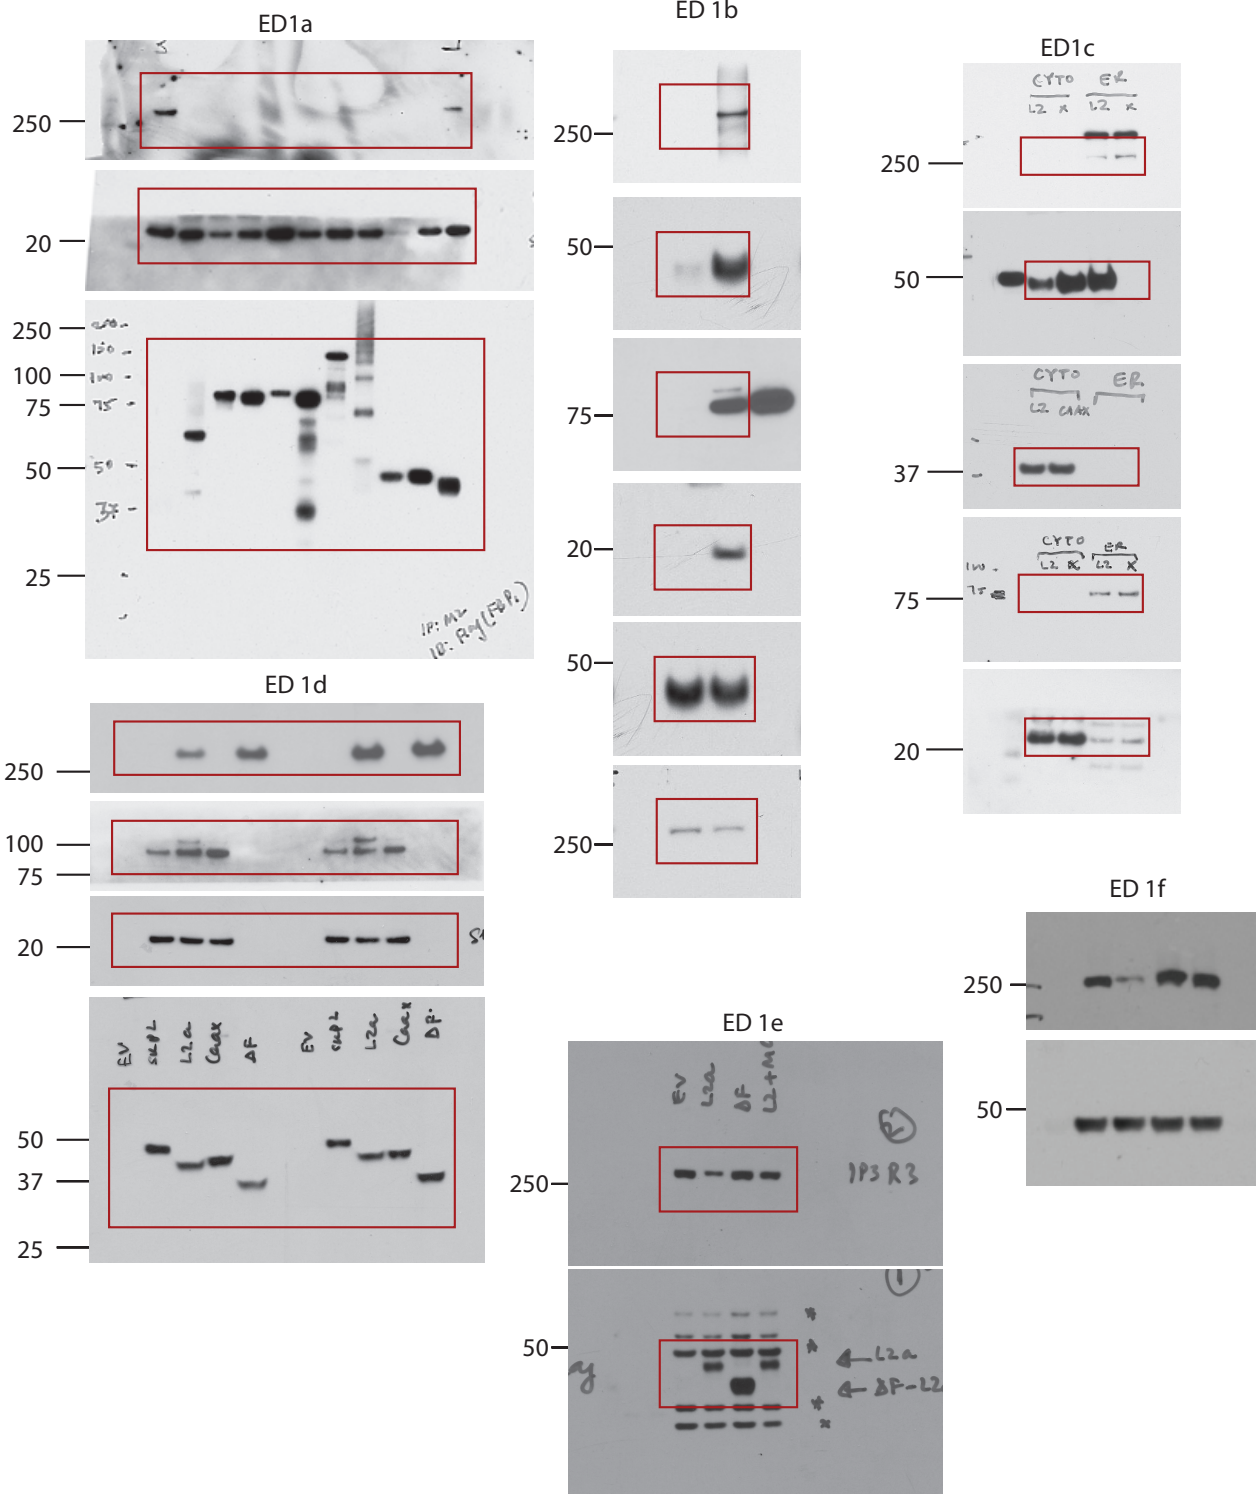

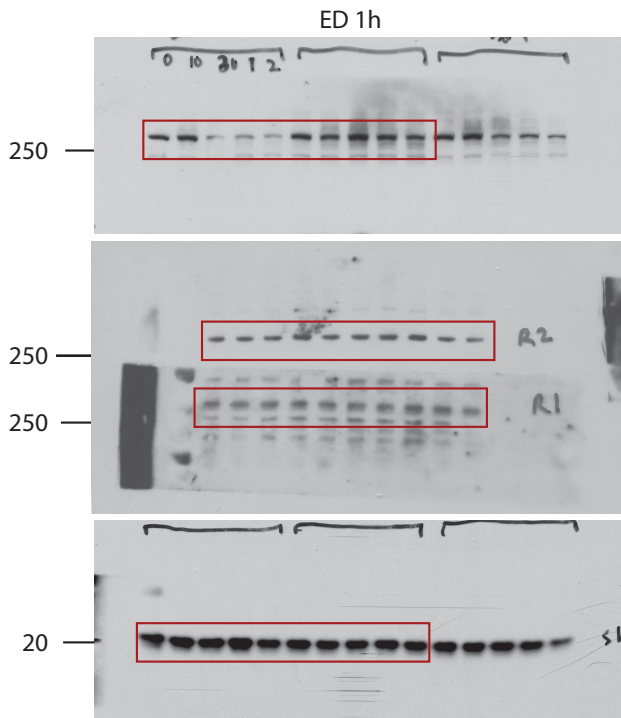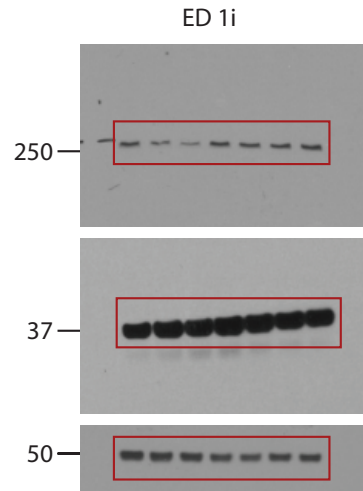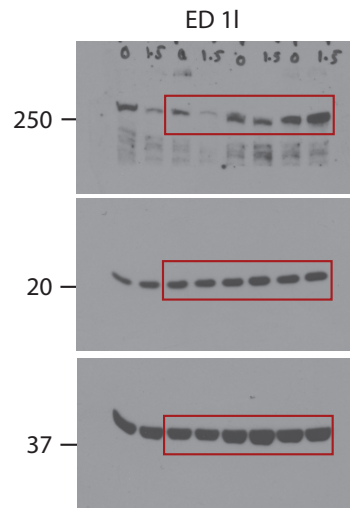

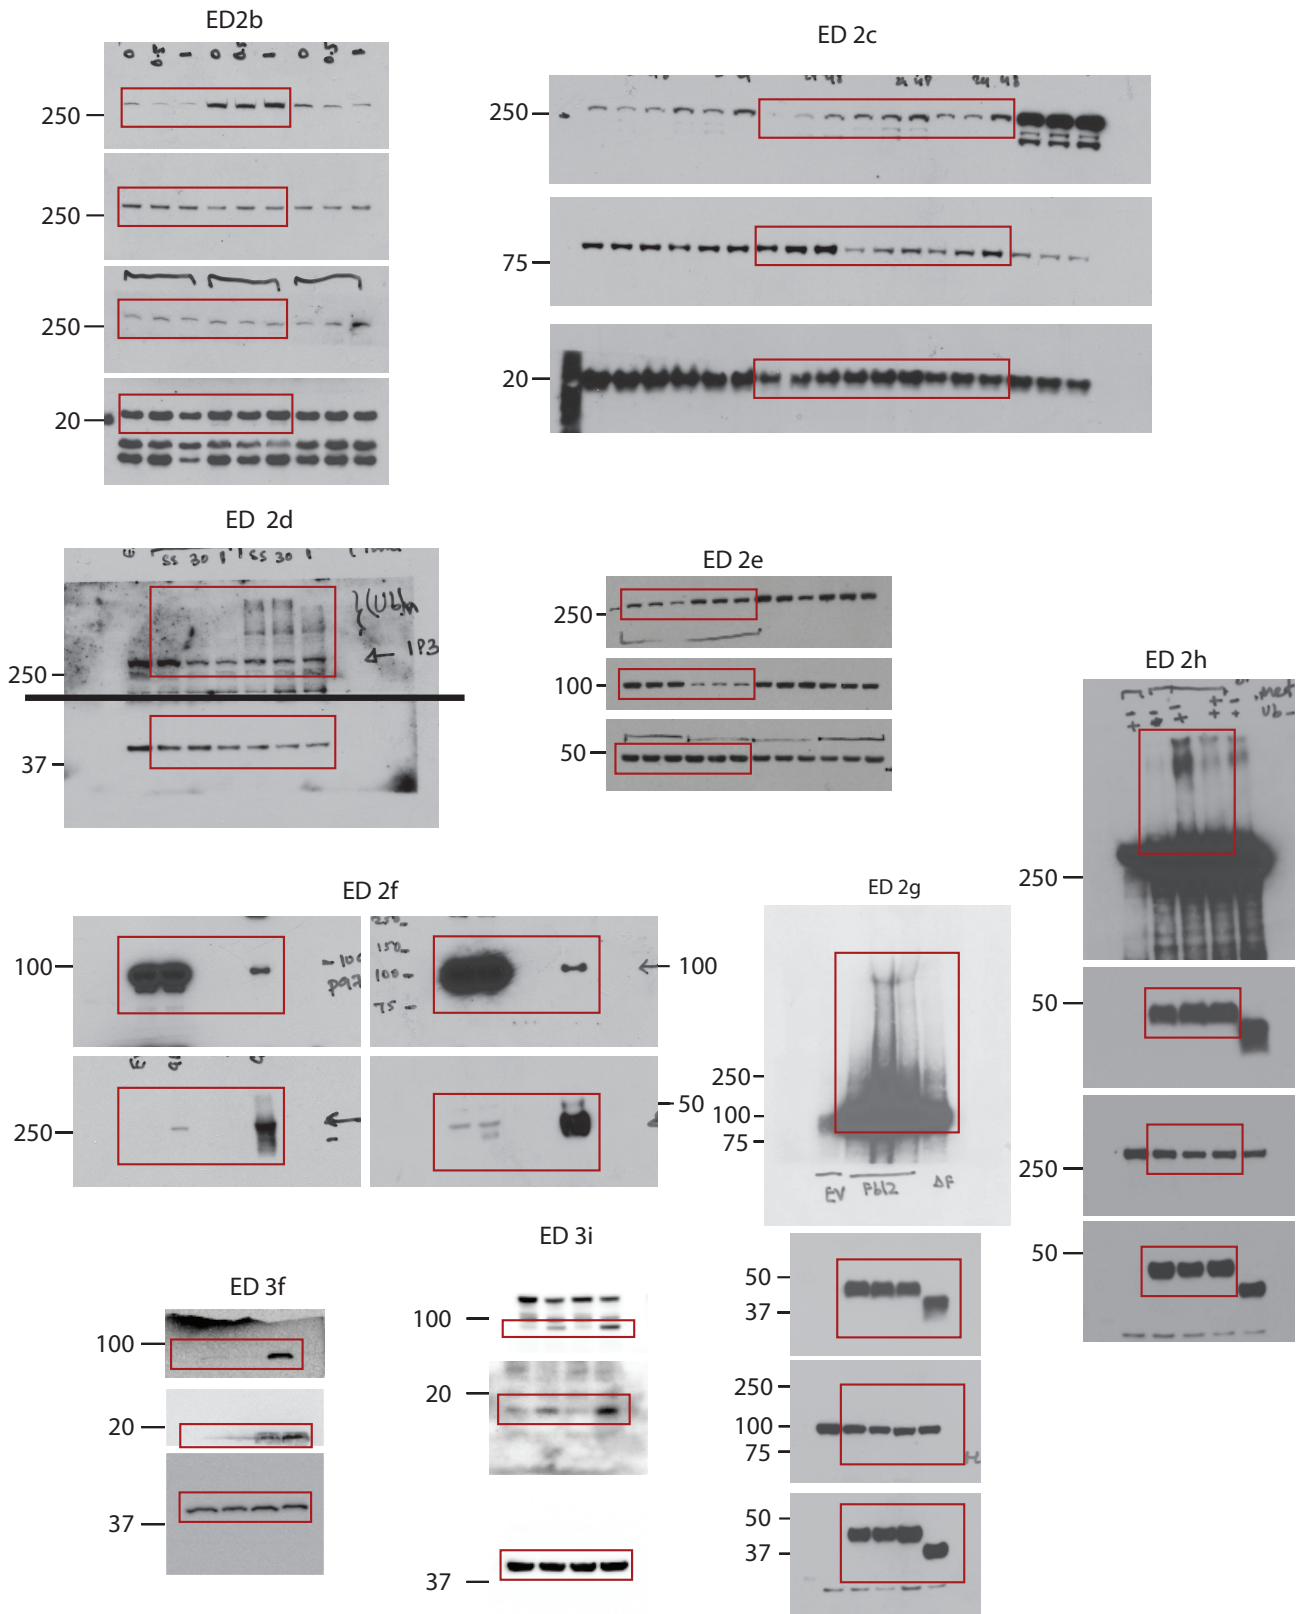

ED 4b

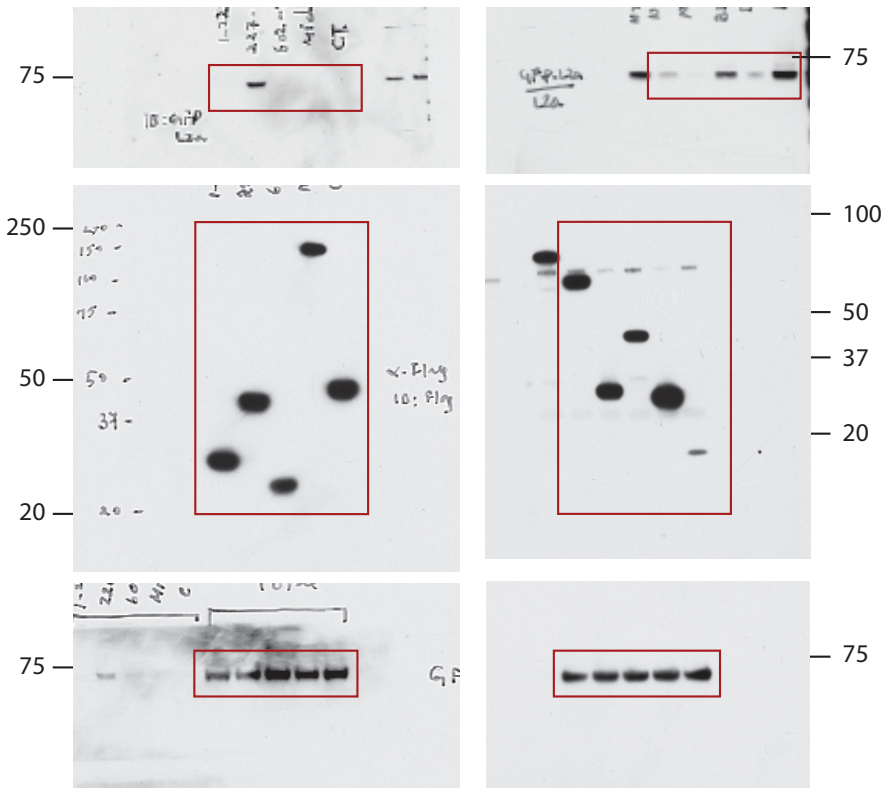

ED 4c

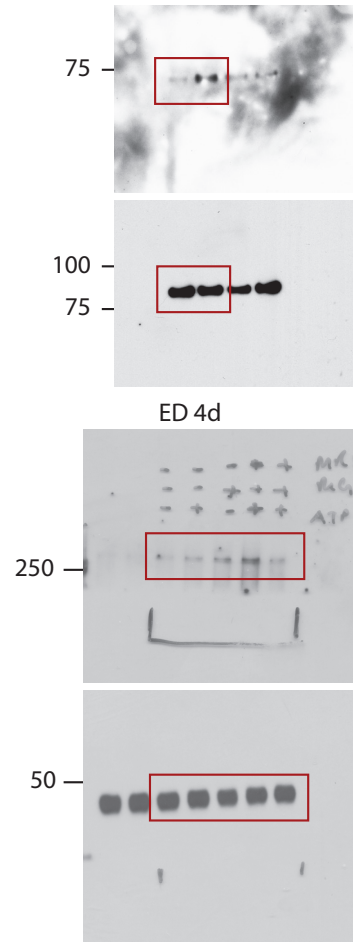

ED 4e

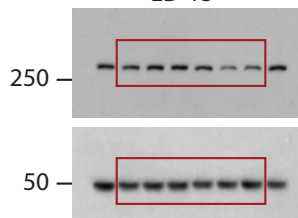

ED 4j

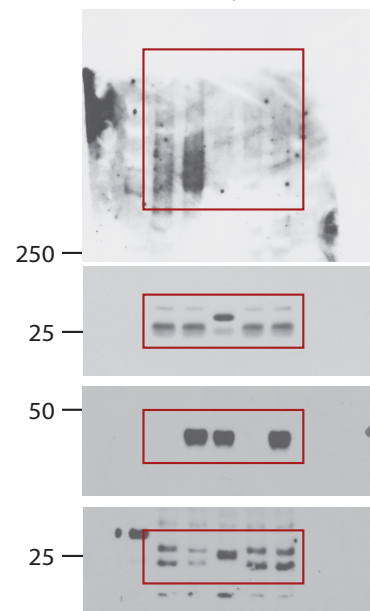

ED 4f

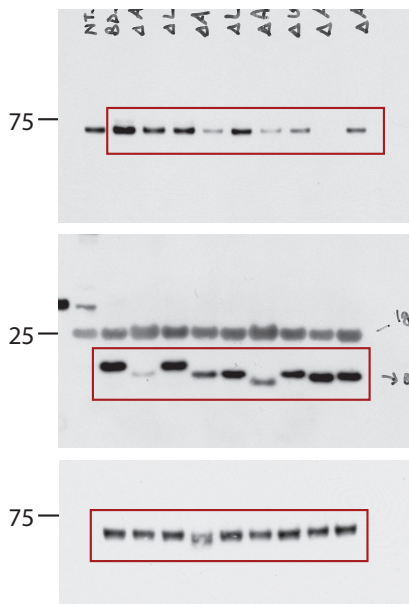

ED 4g

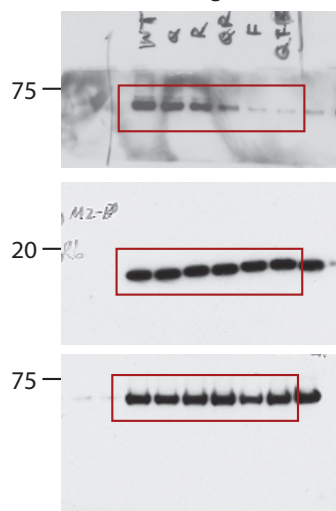

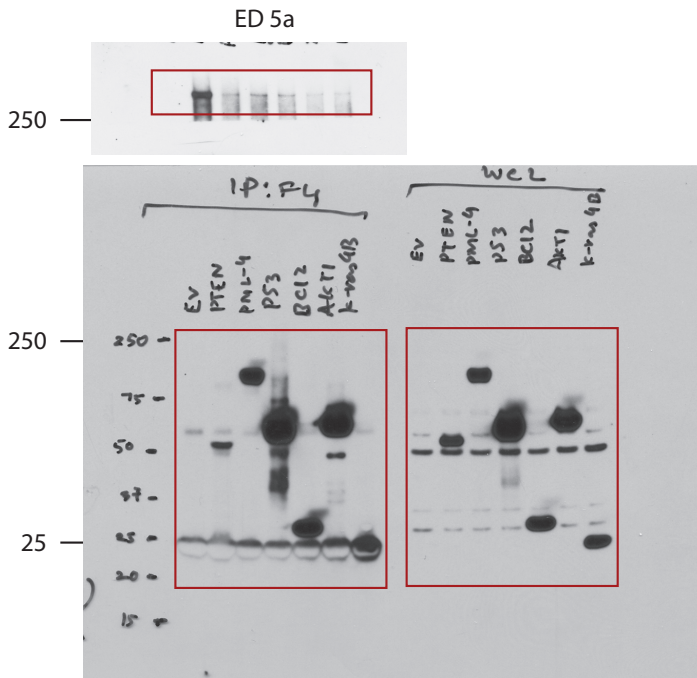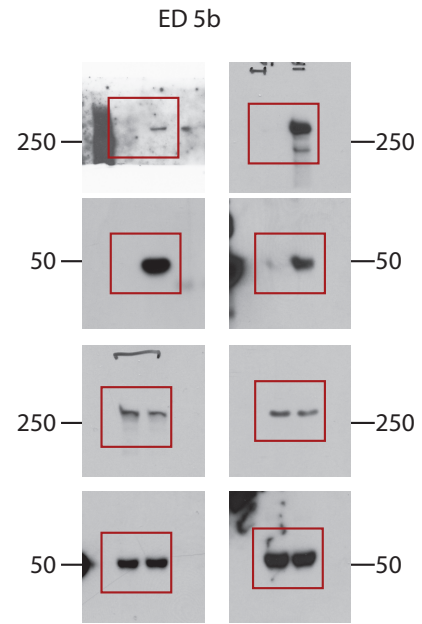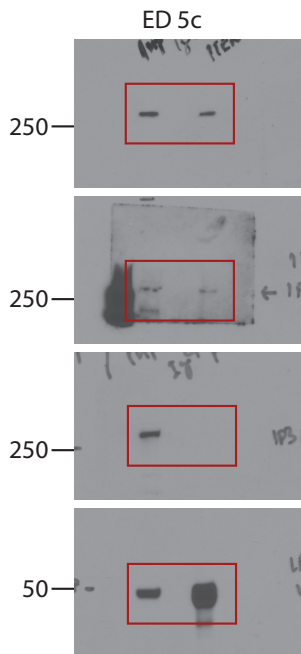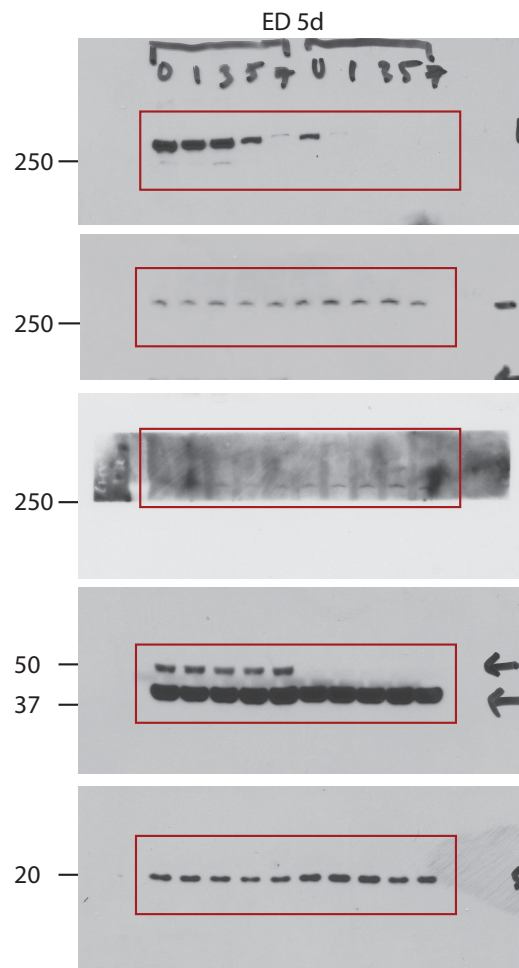



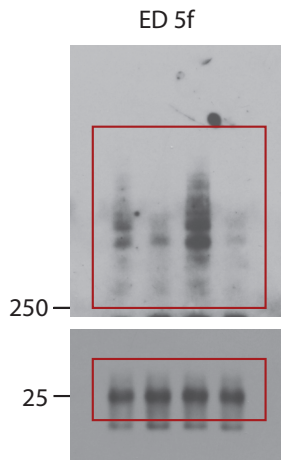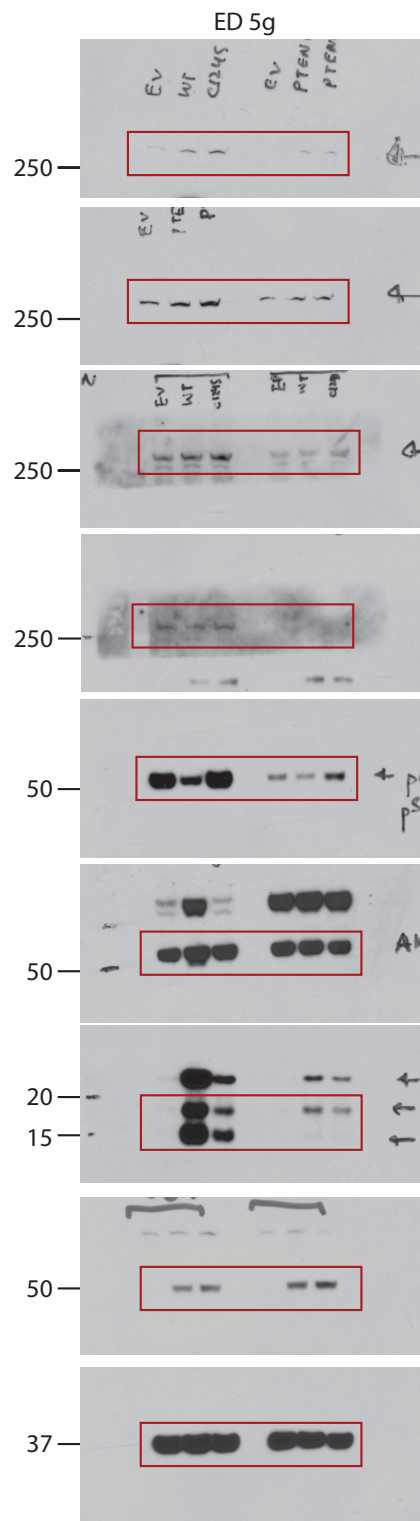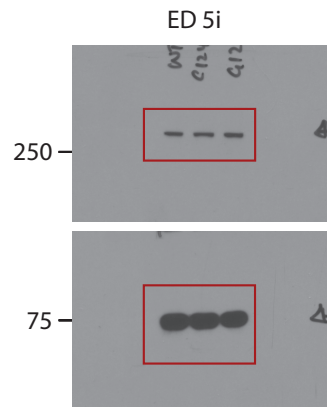

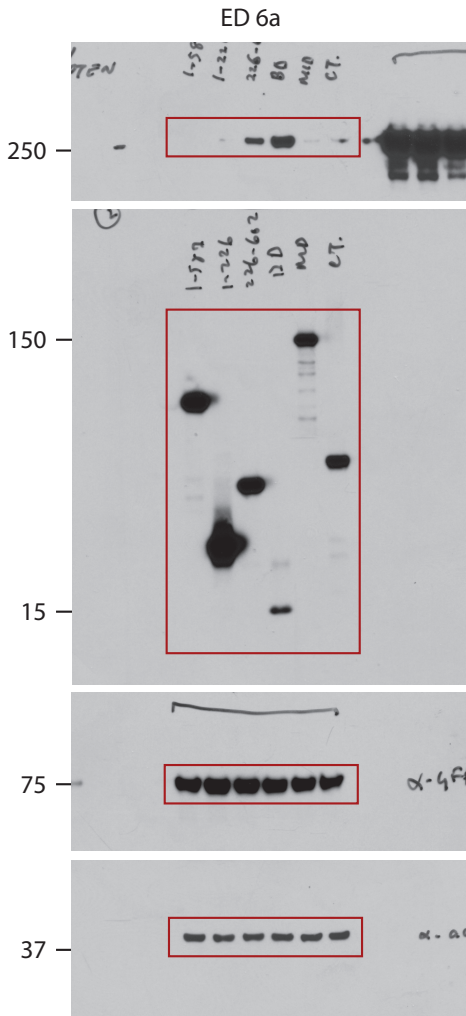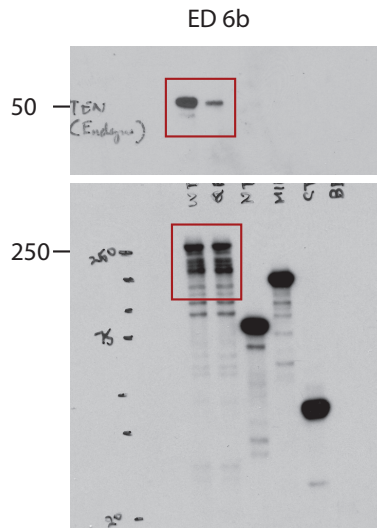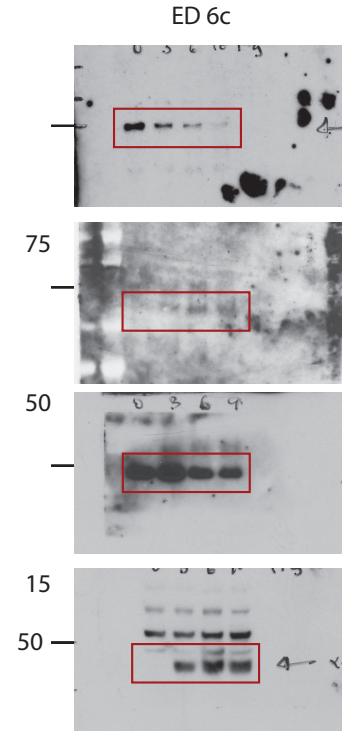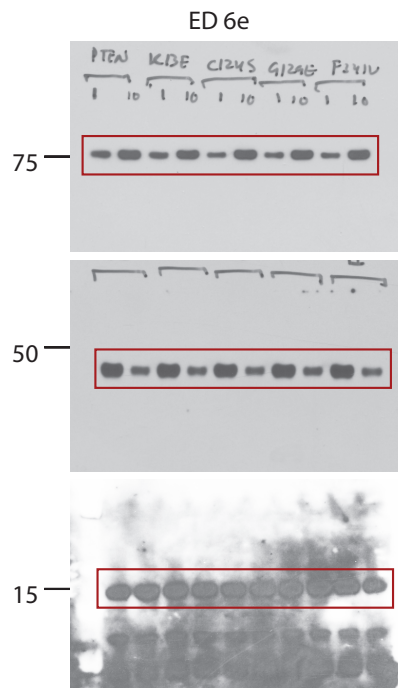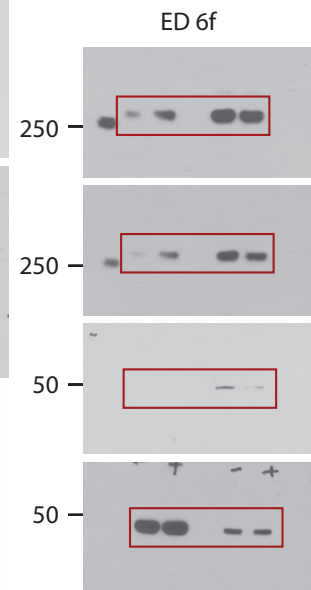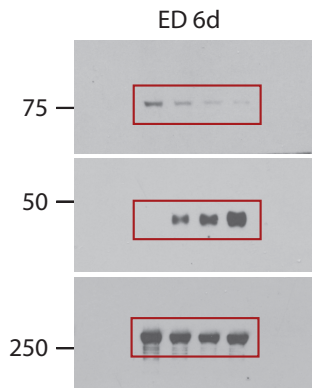

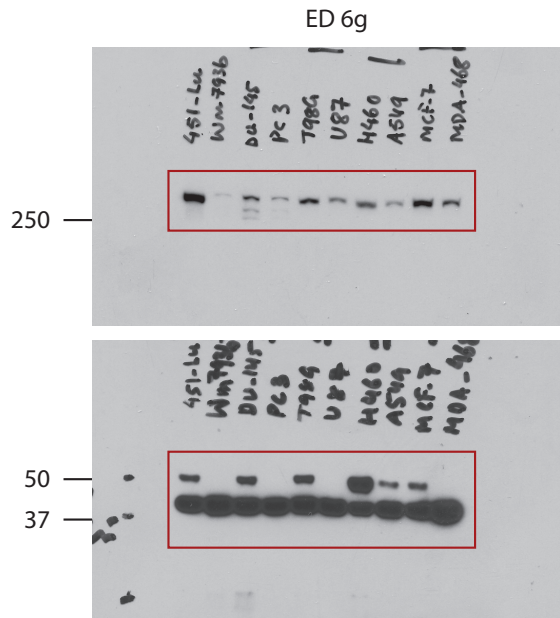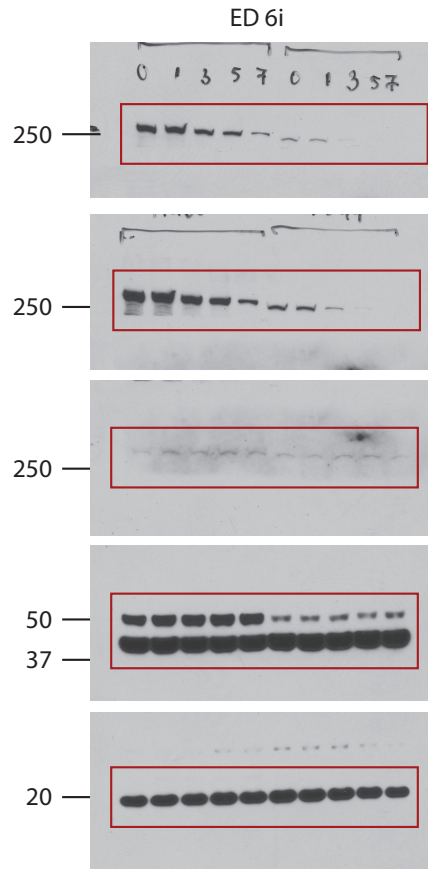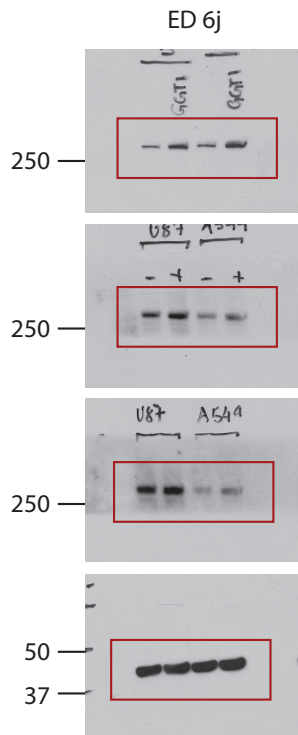

ED 7b (Prostate)

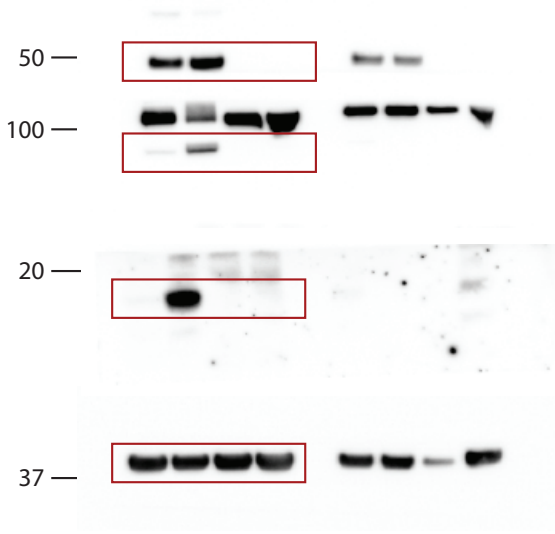

ED 7b (Lung)

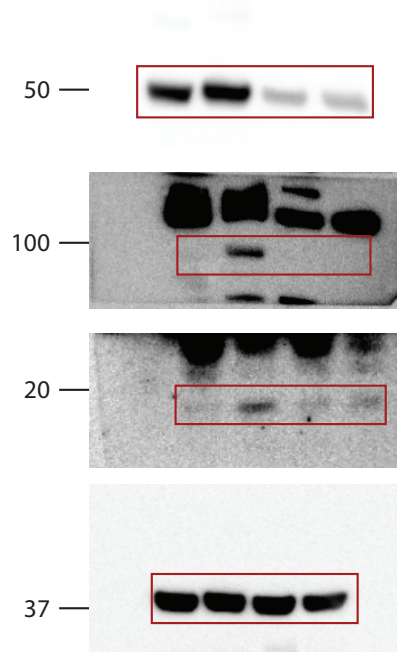

ED 7b (Melanoma)

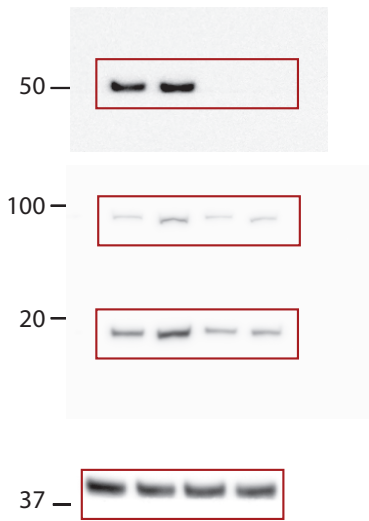

ED 7c

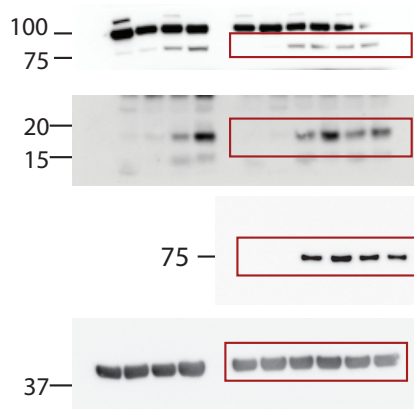

ED 7d

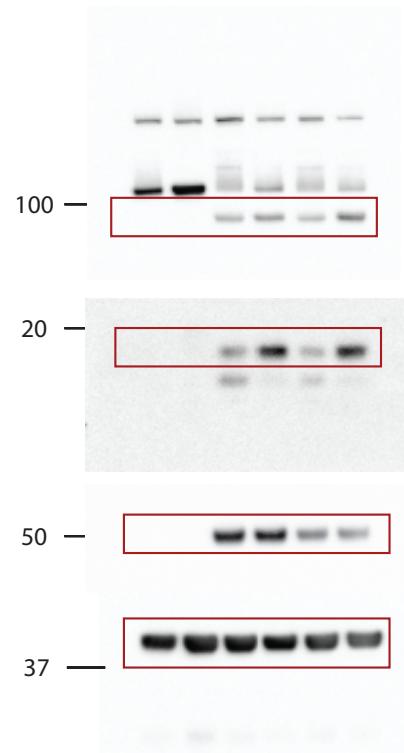

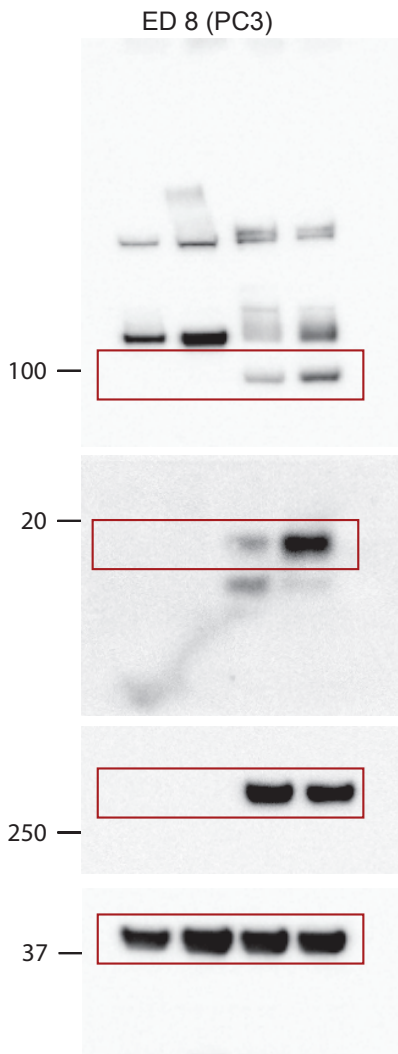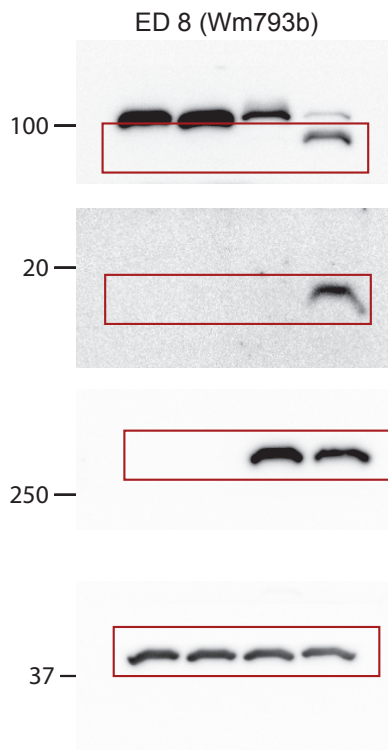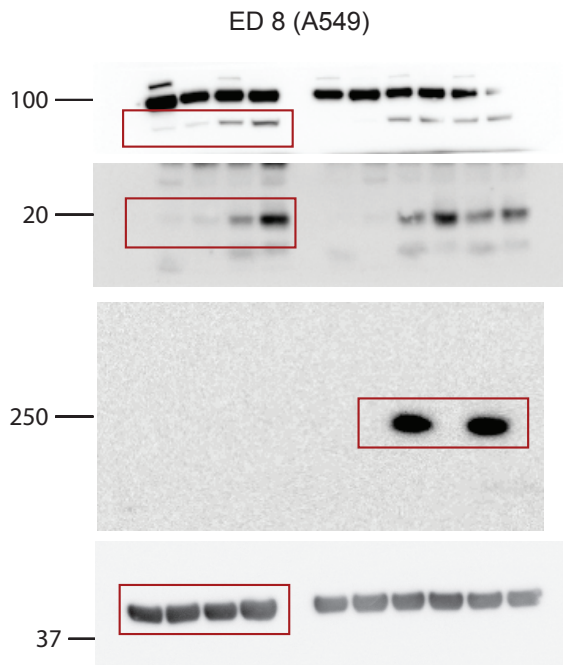

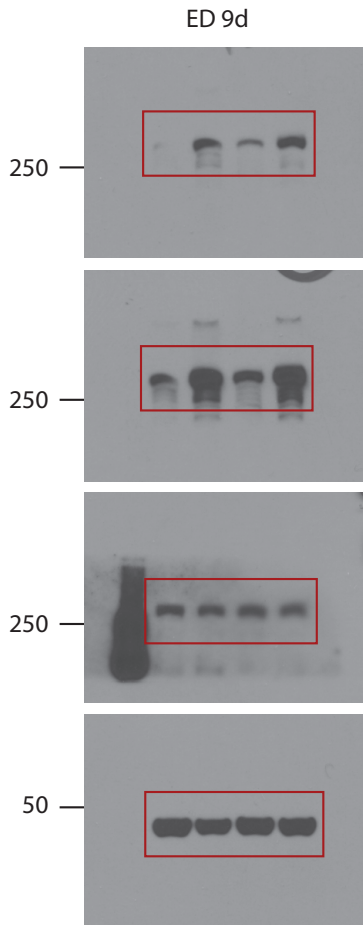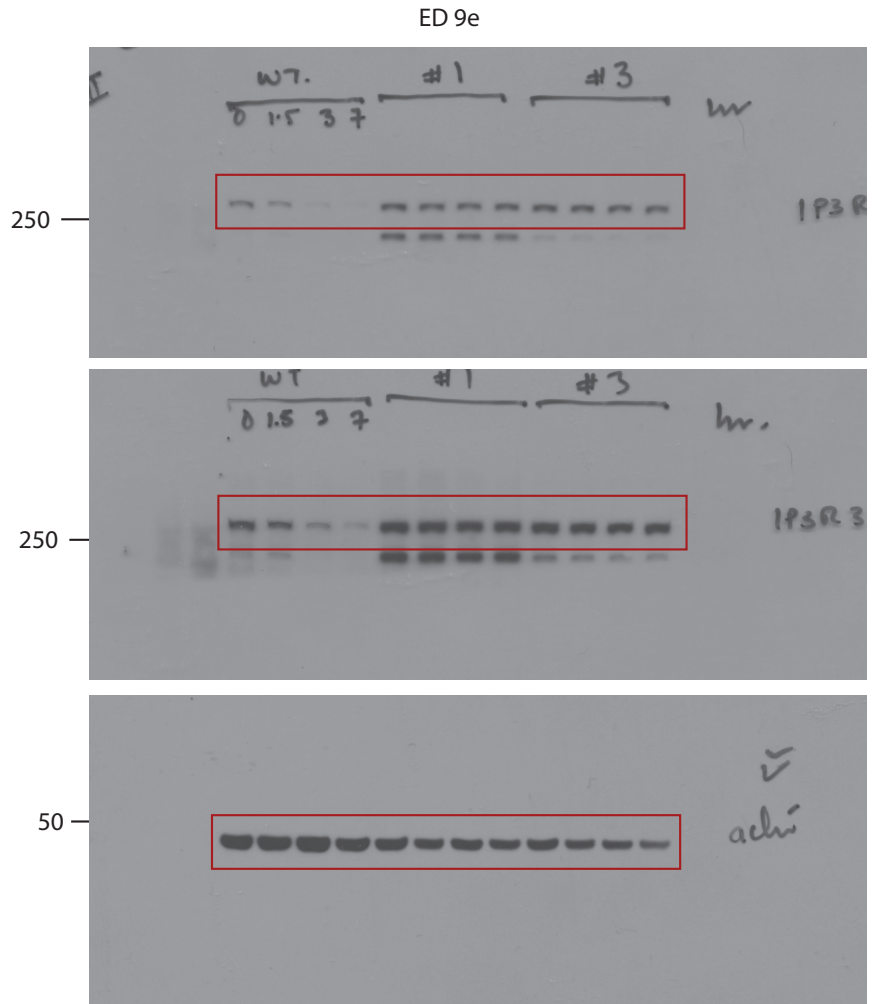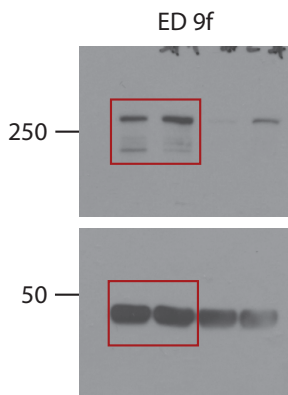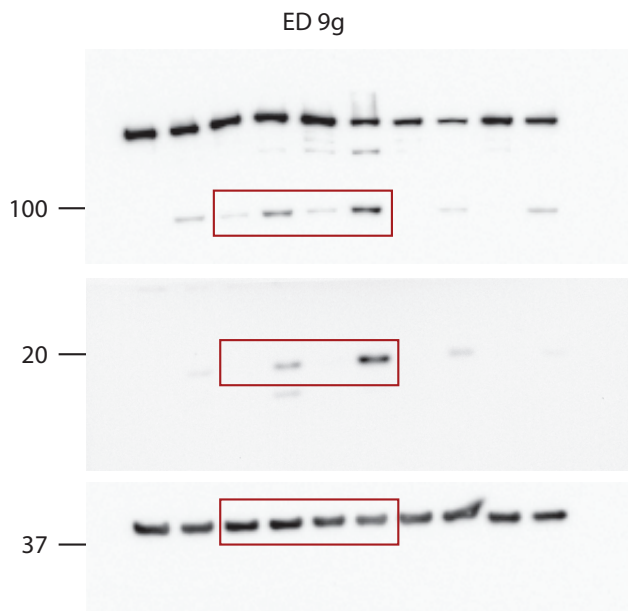

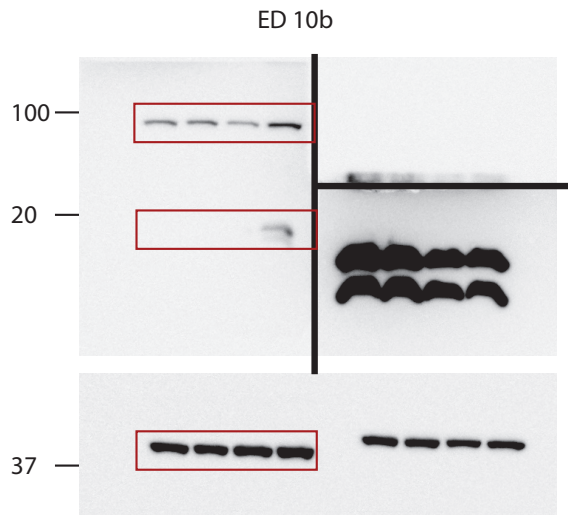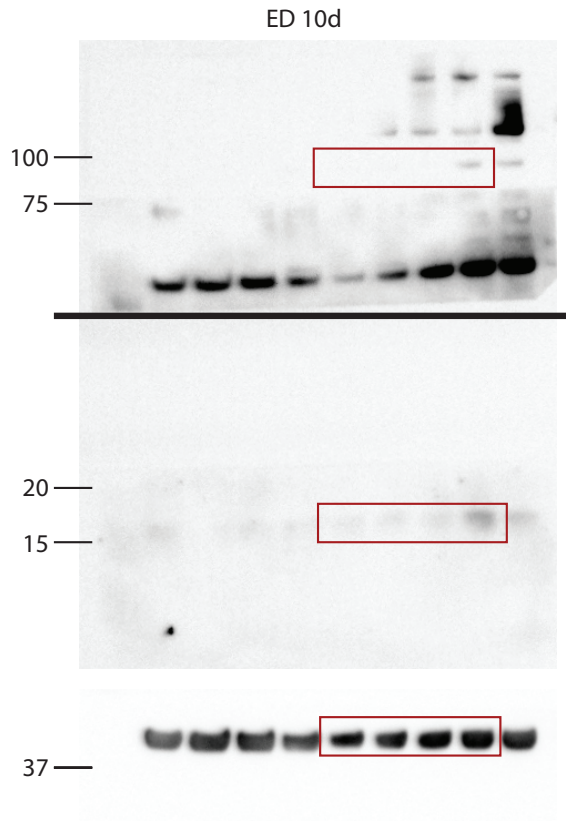

Supplement: NIHMS906616-supplement-Supplemental_2.pdf [file NIHMS906616-supplement-Supplemental_2.pdf]
